# Supplementary material
Source: Royal Society of Chemistry journal article supplement (doi:10.1039/d6ea00049e)

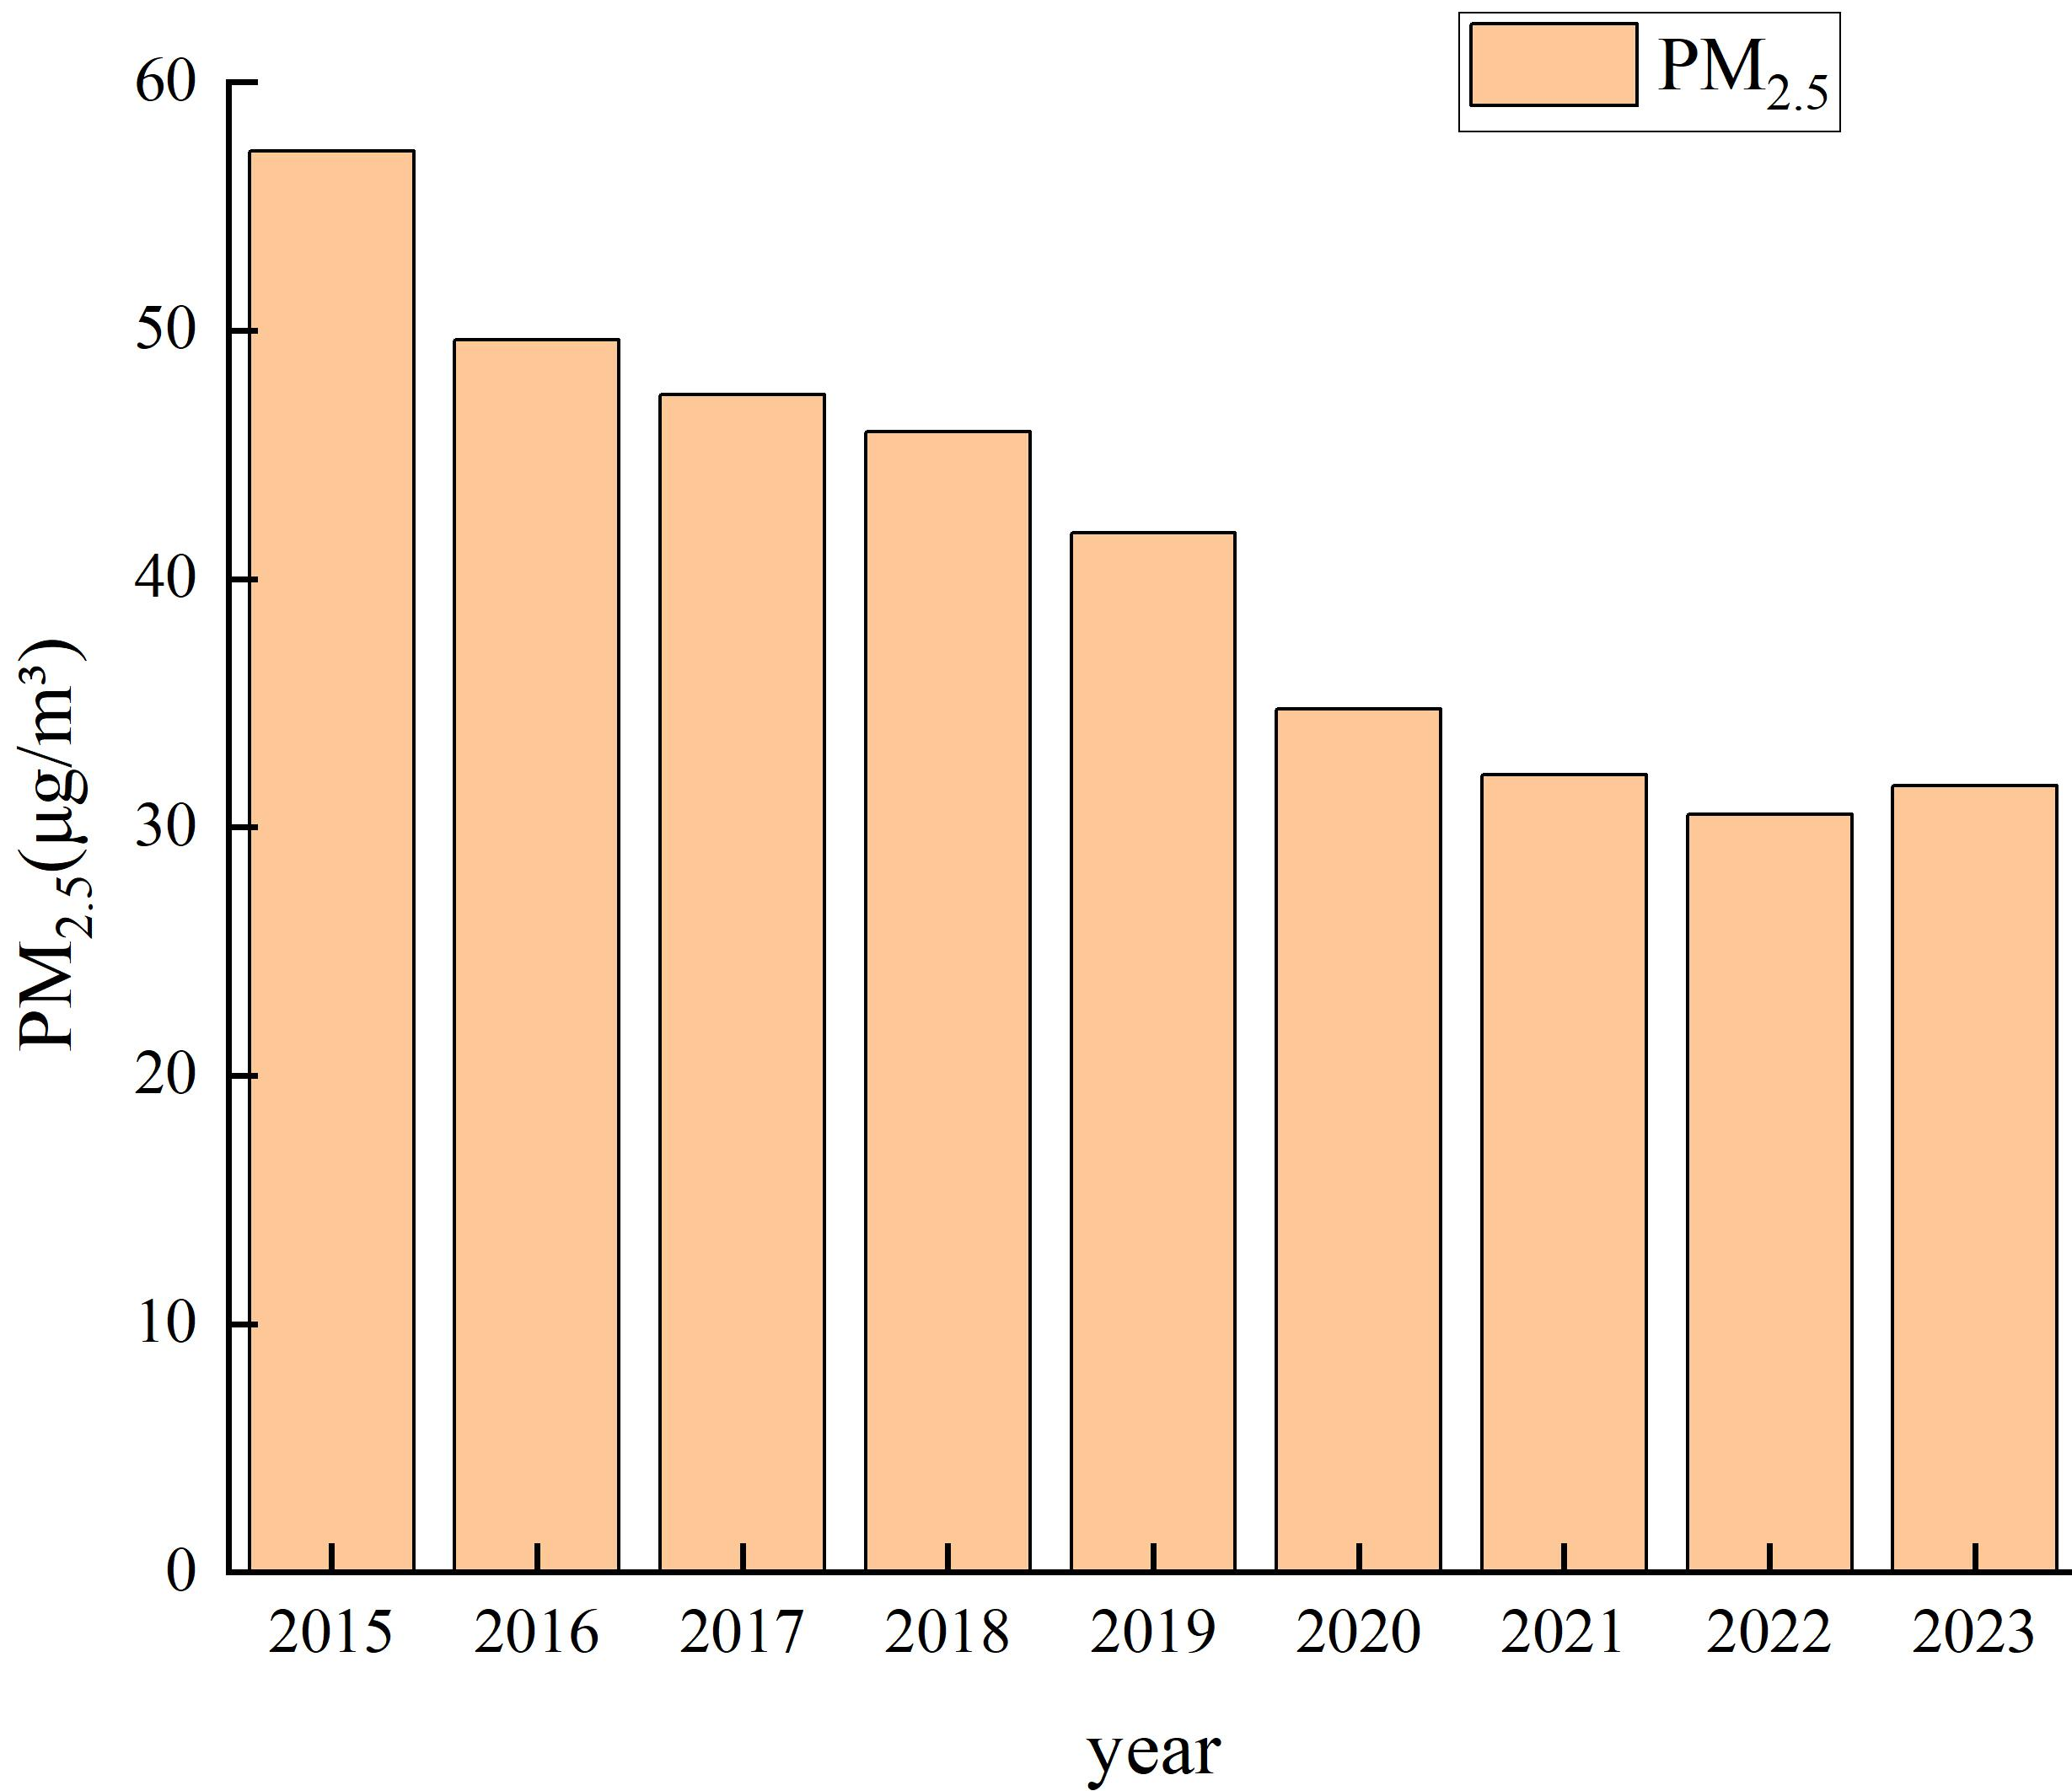

Supplement: d6ea00049e2.pdf [file d6ea00049e2.pdf]

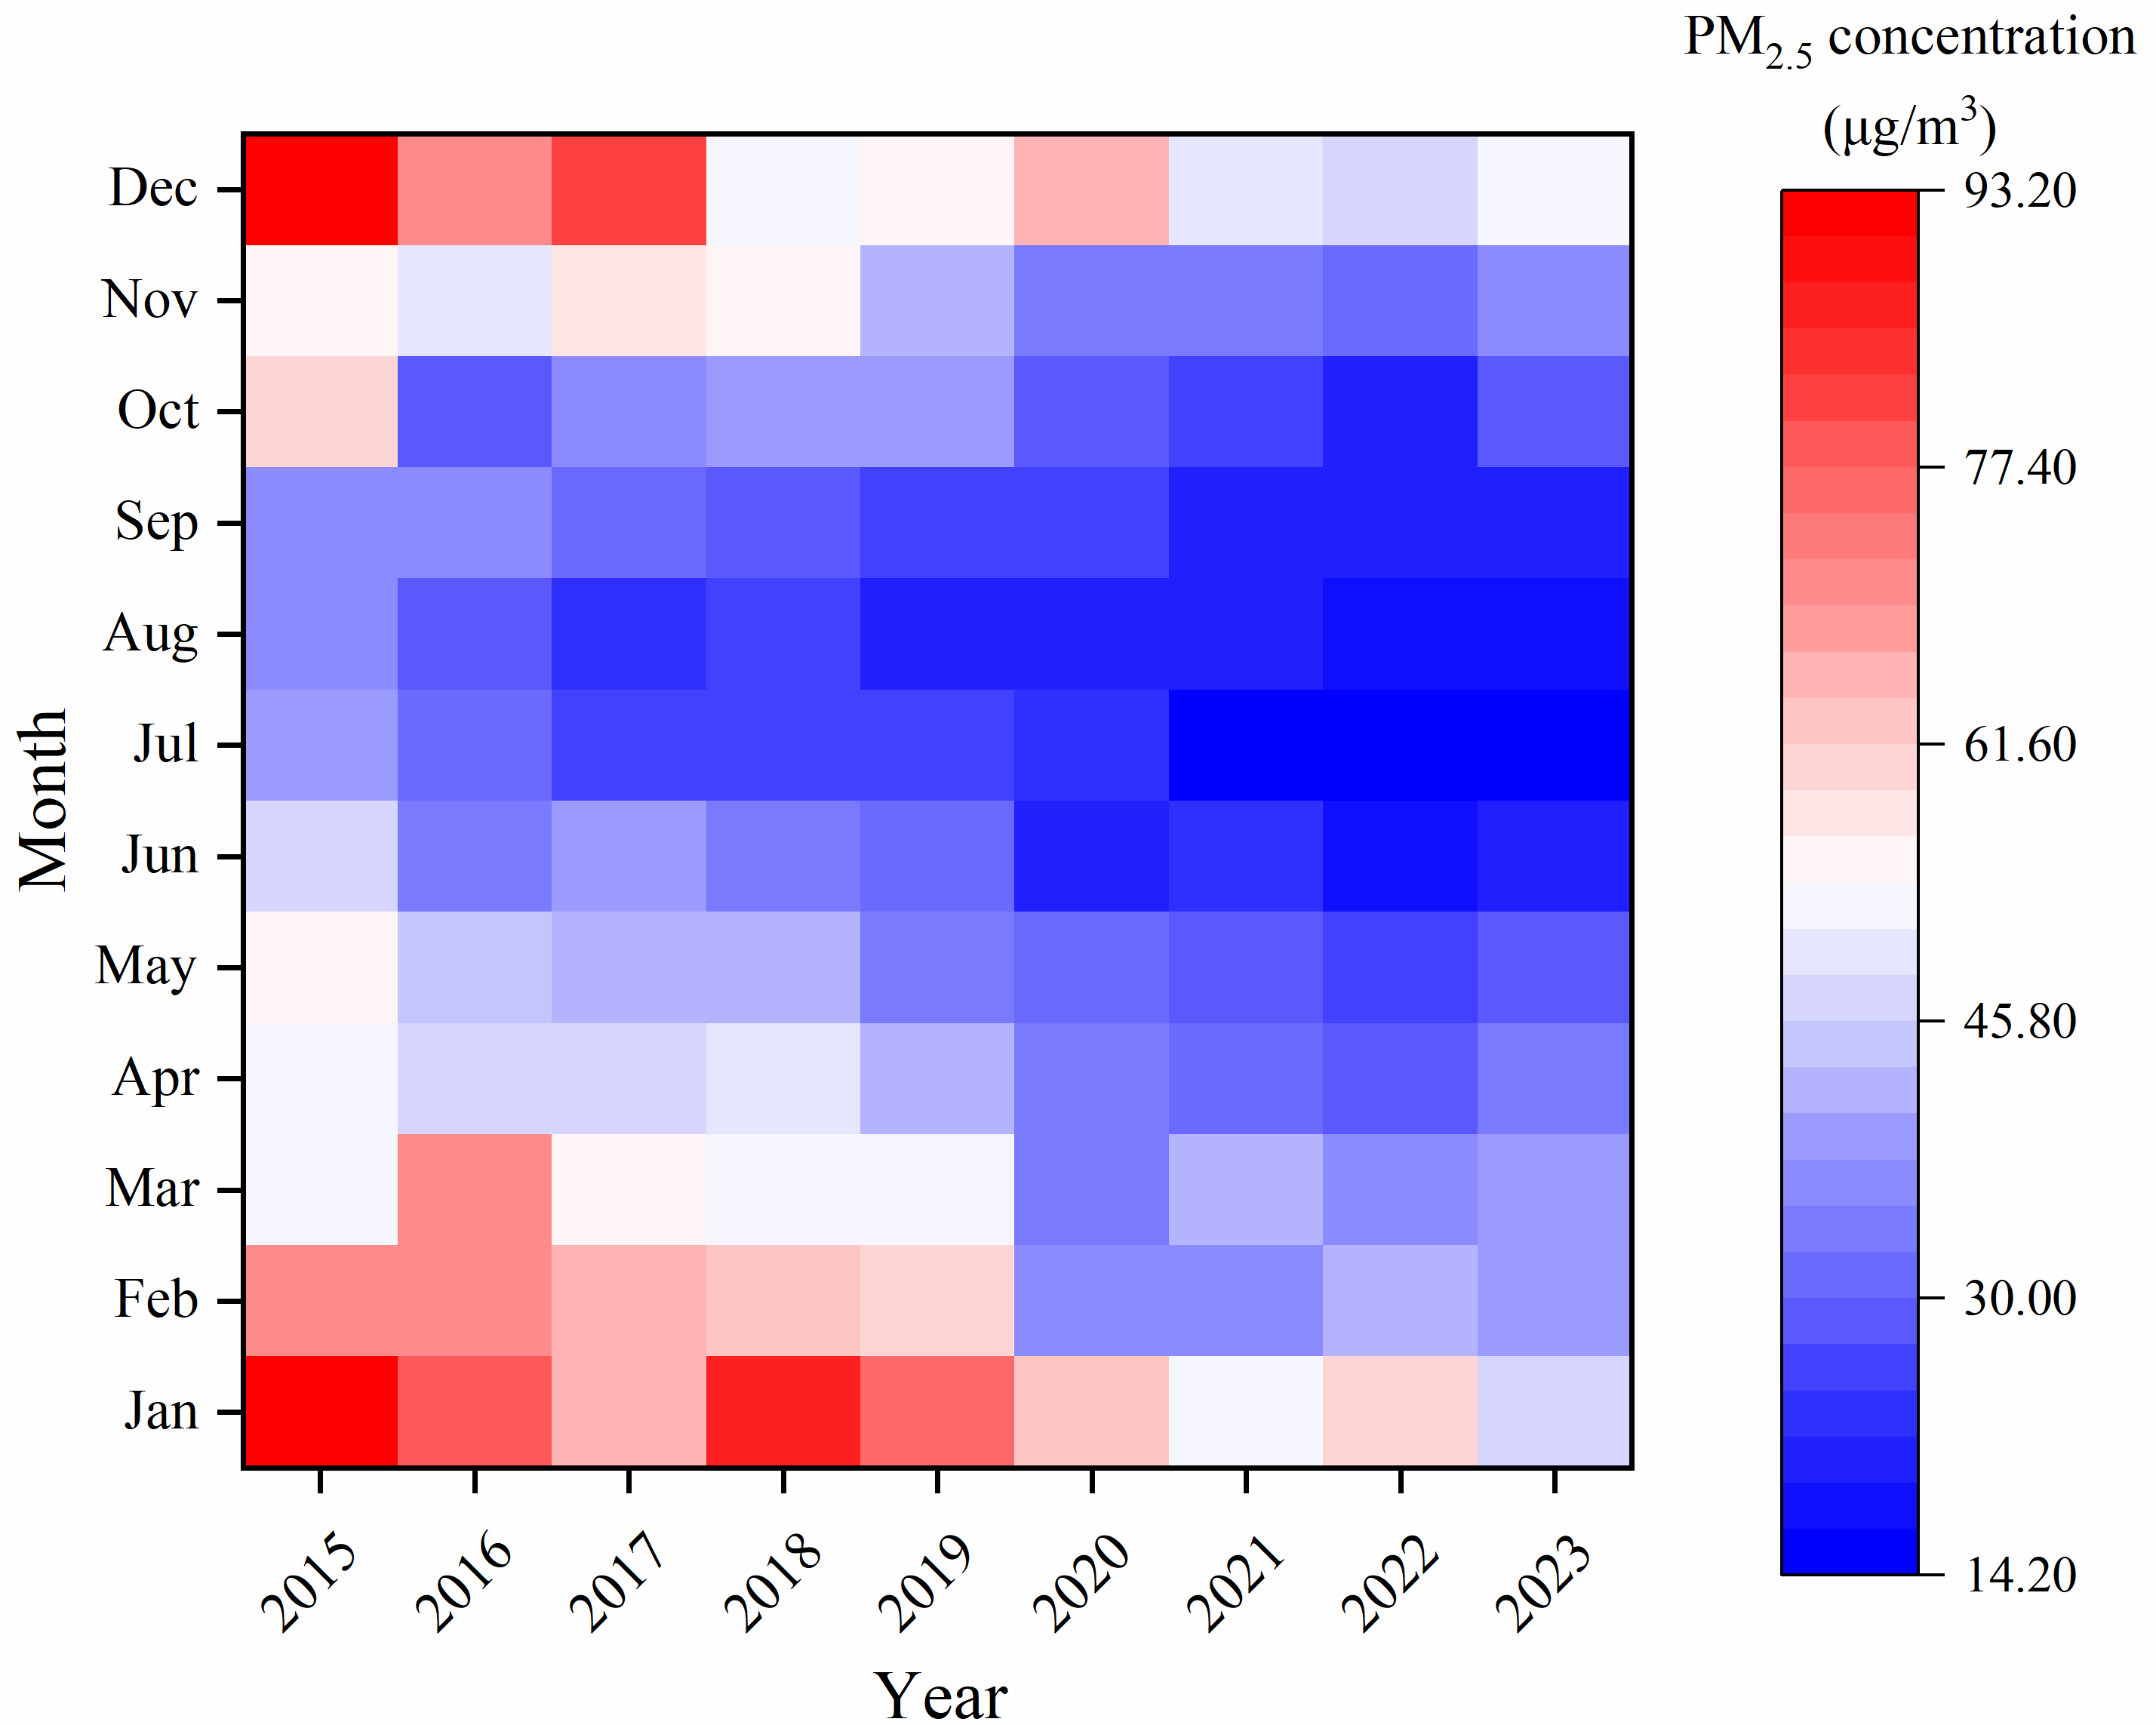

Supplement: d6ea00049e3.pdf [file d6ea00049e3.pdf]

2015

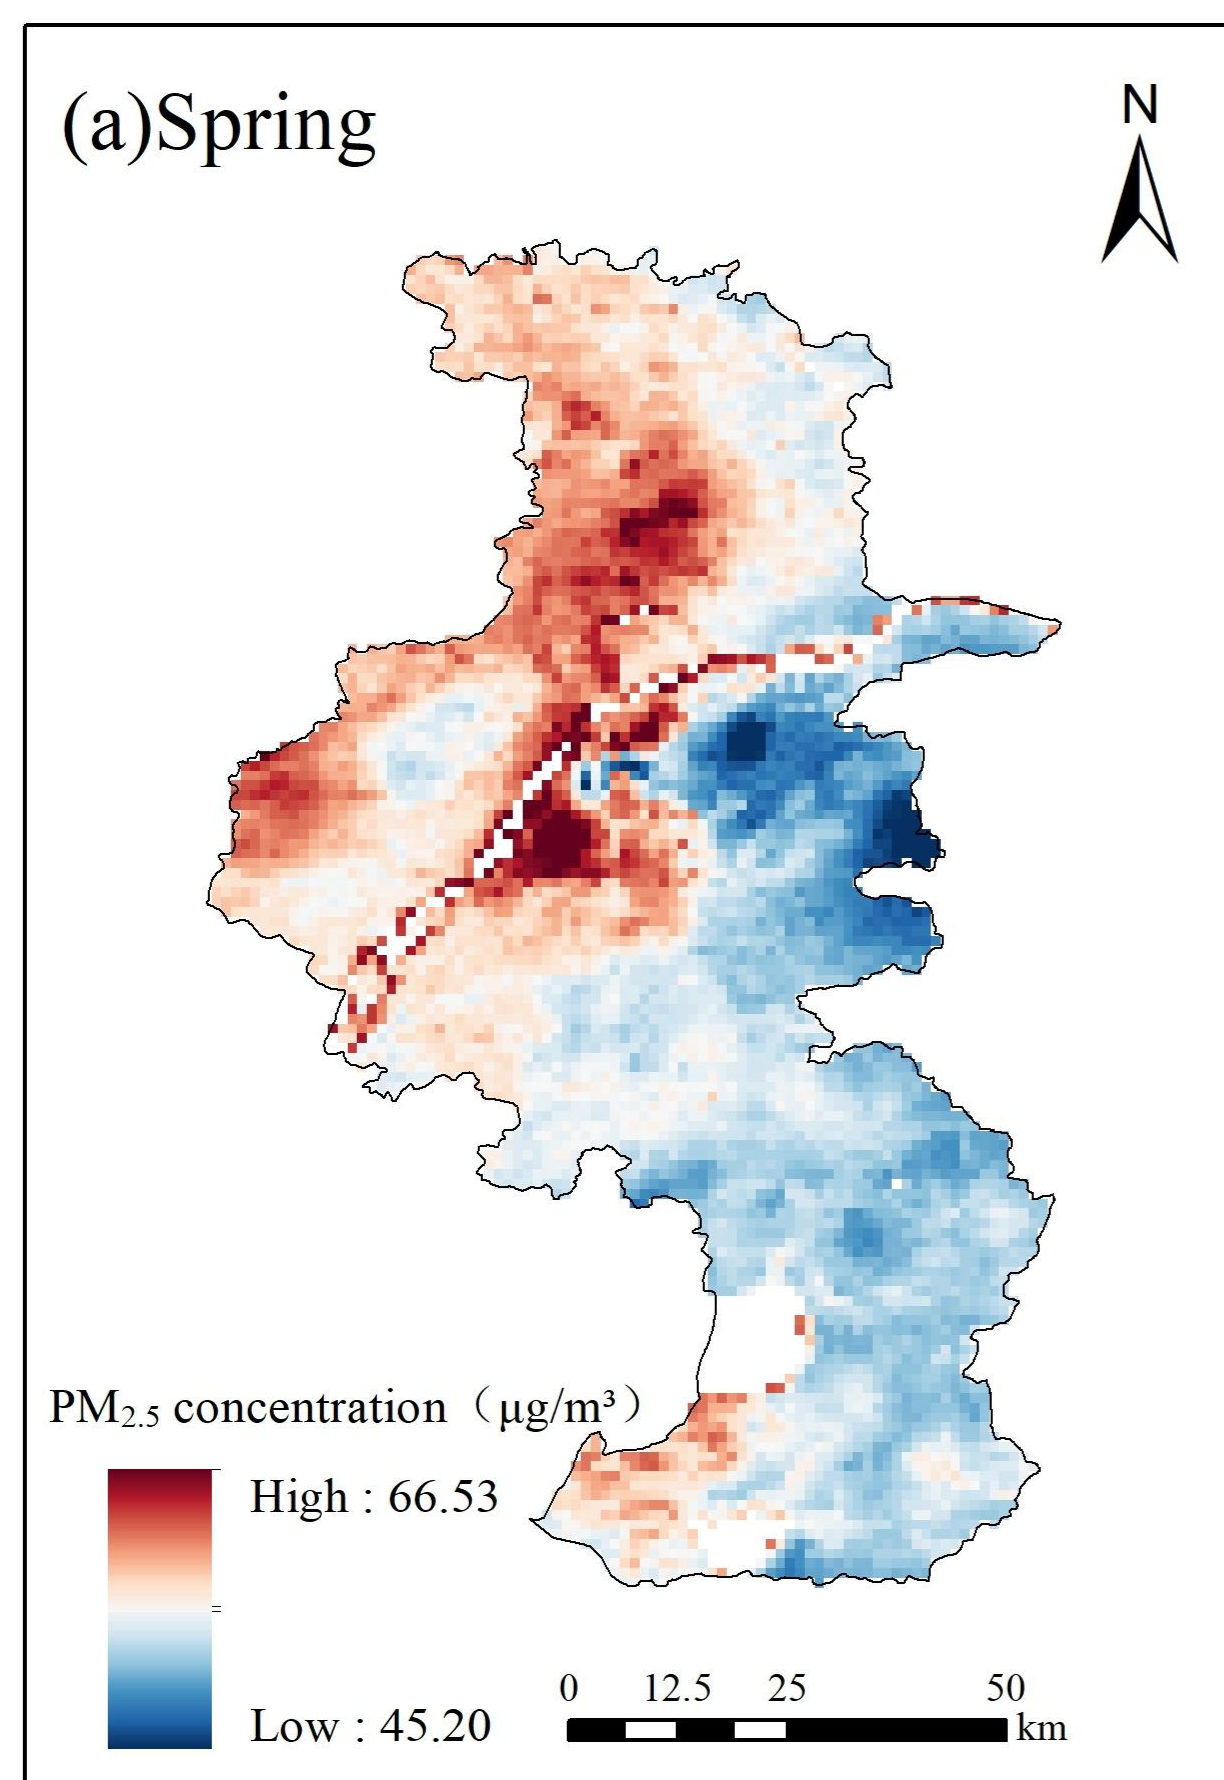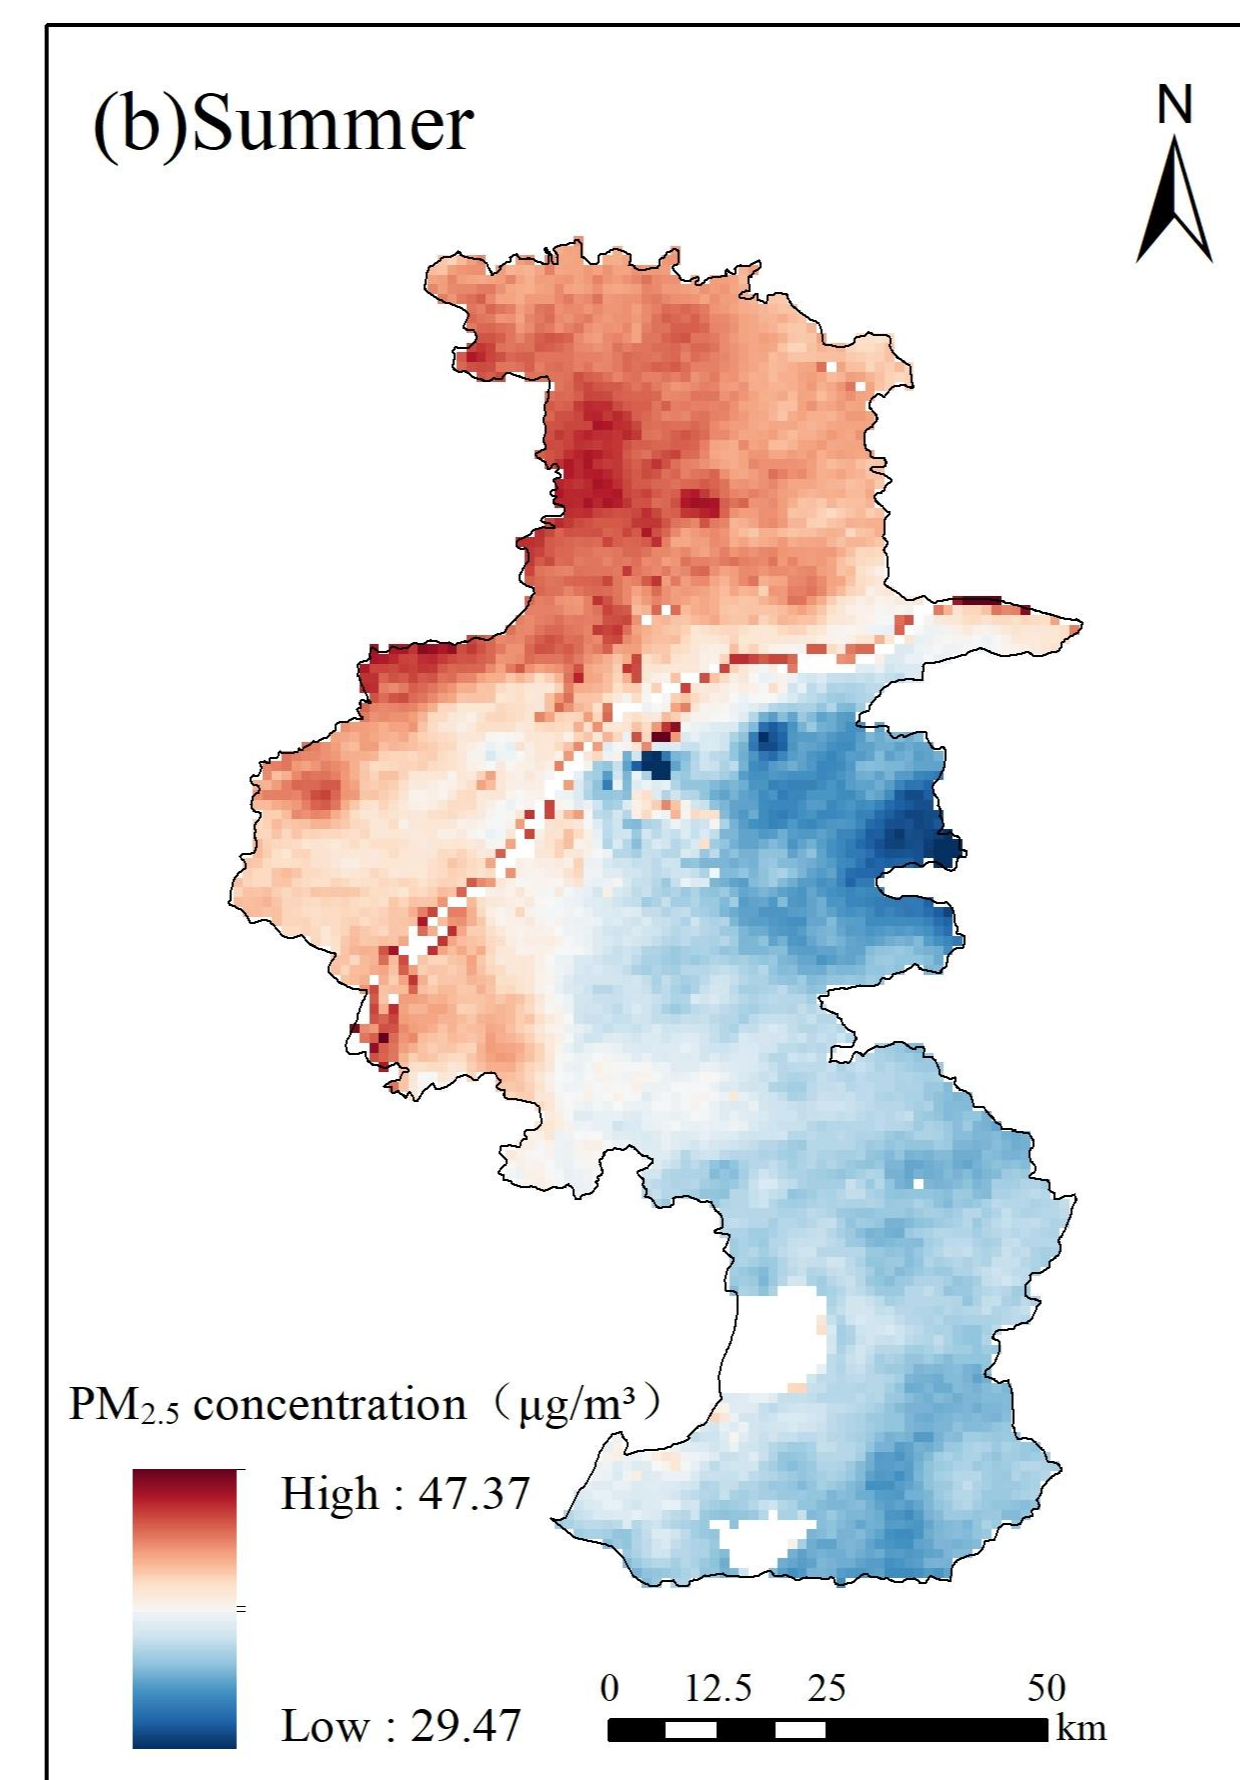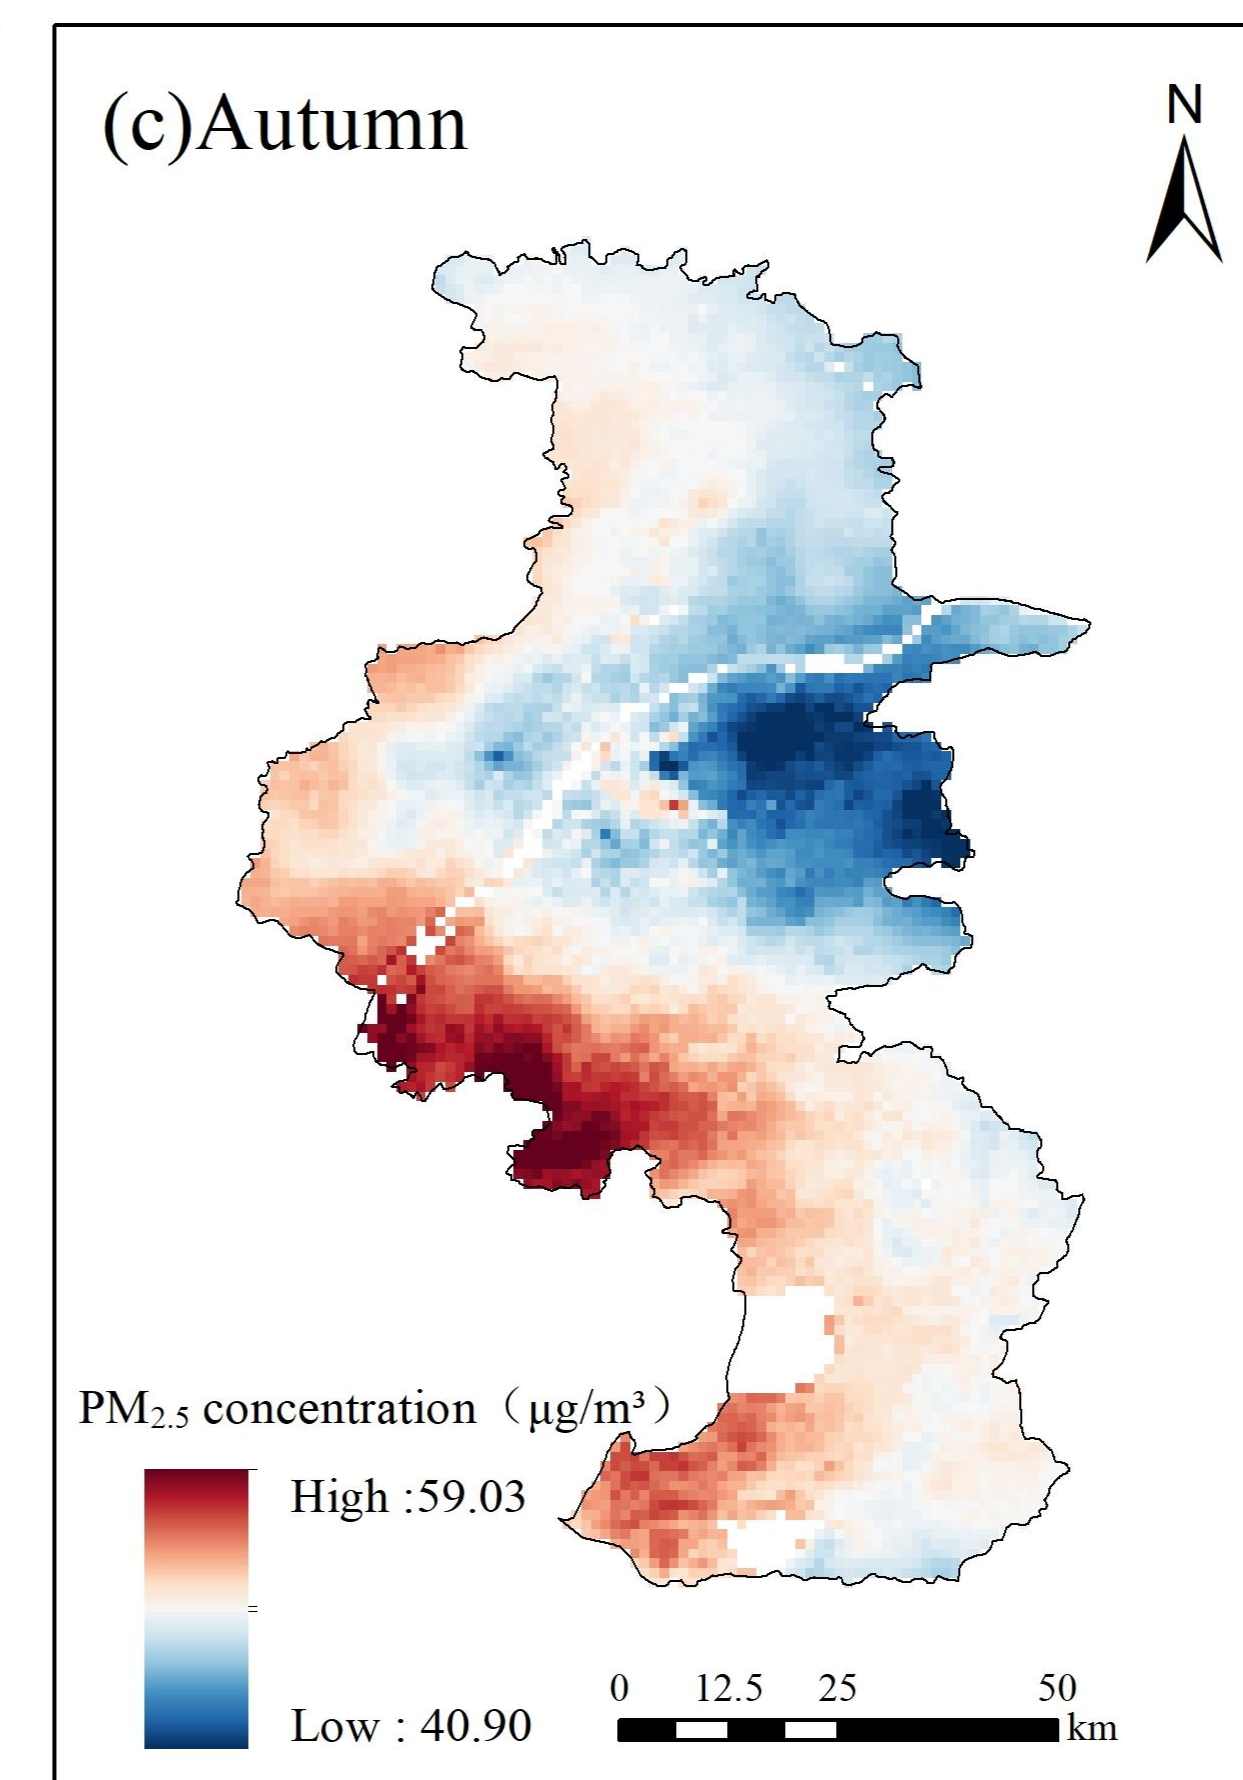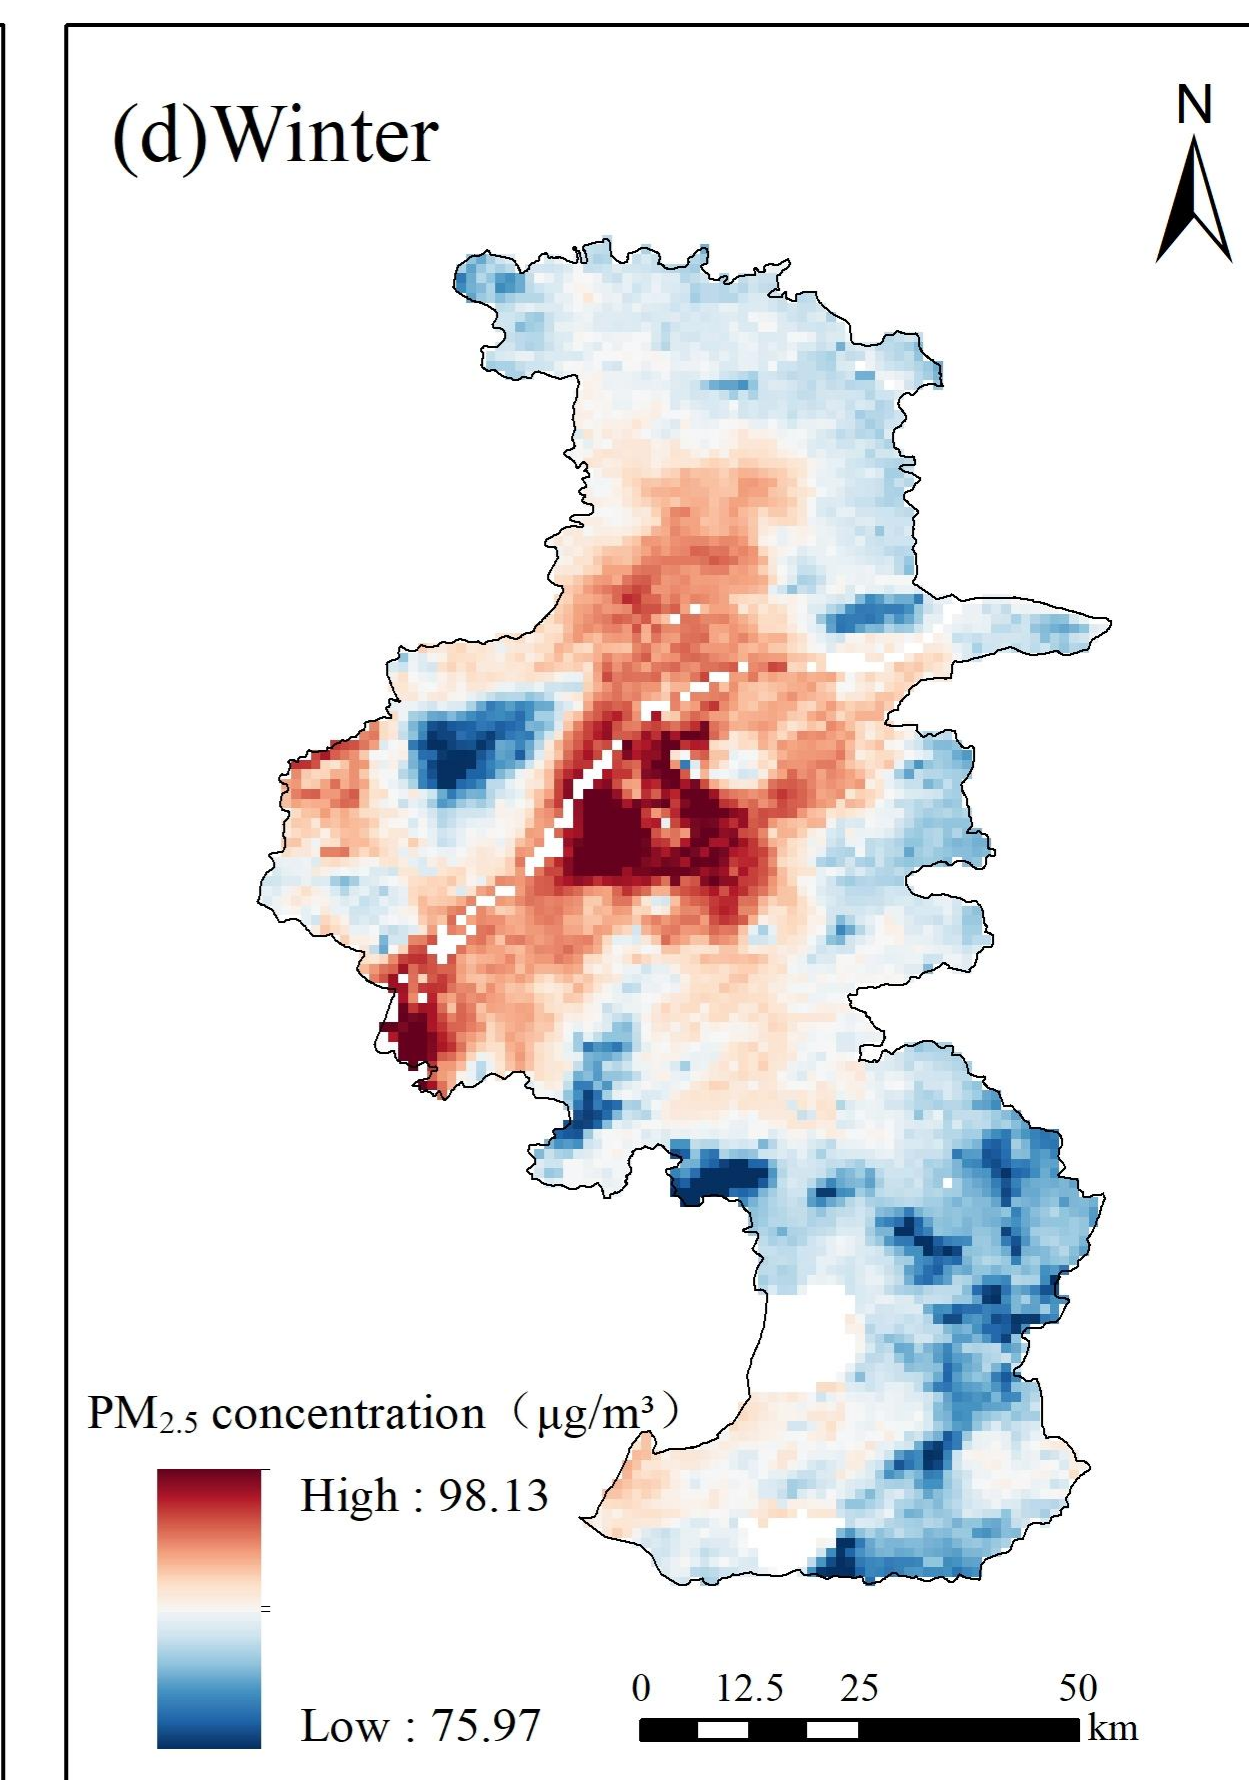

2023

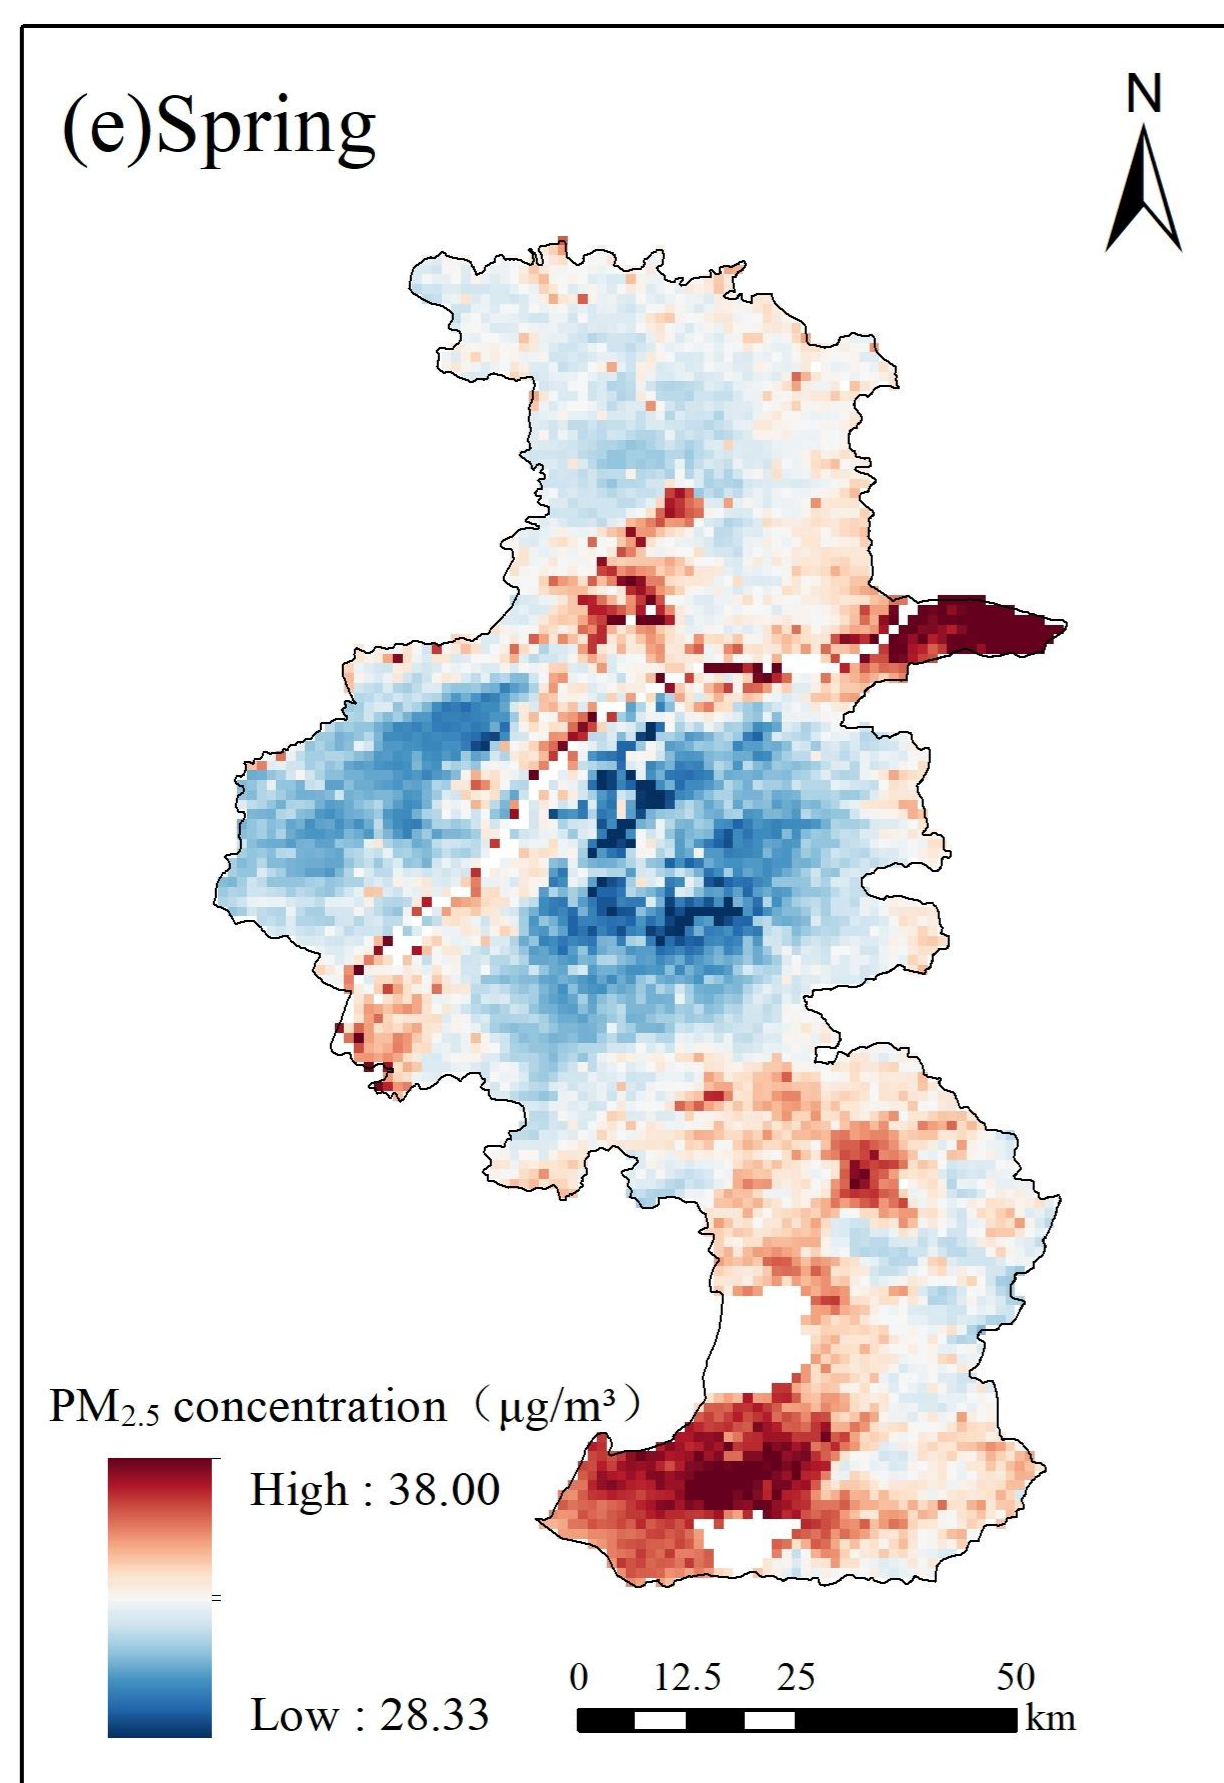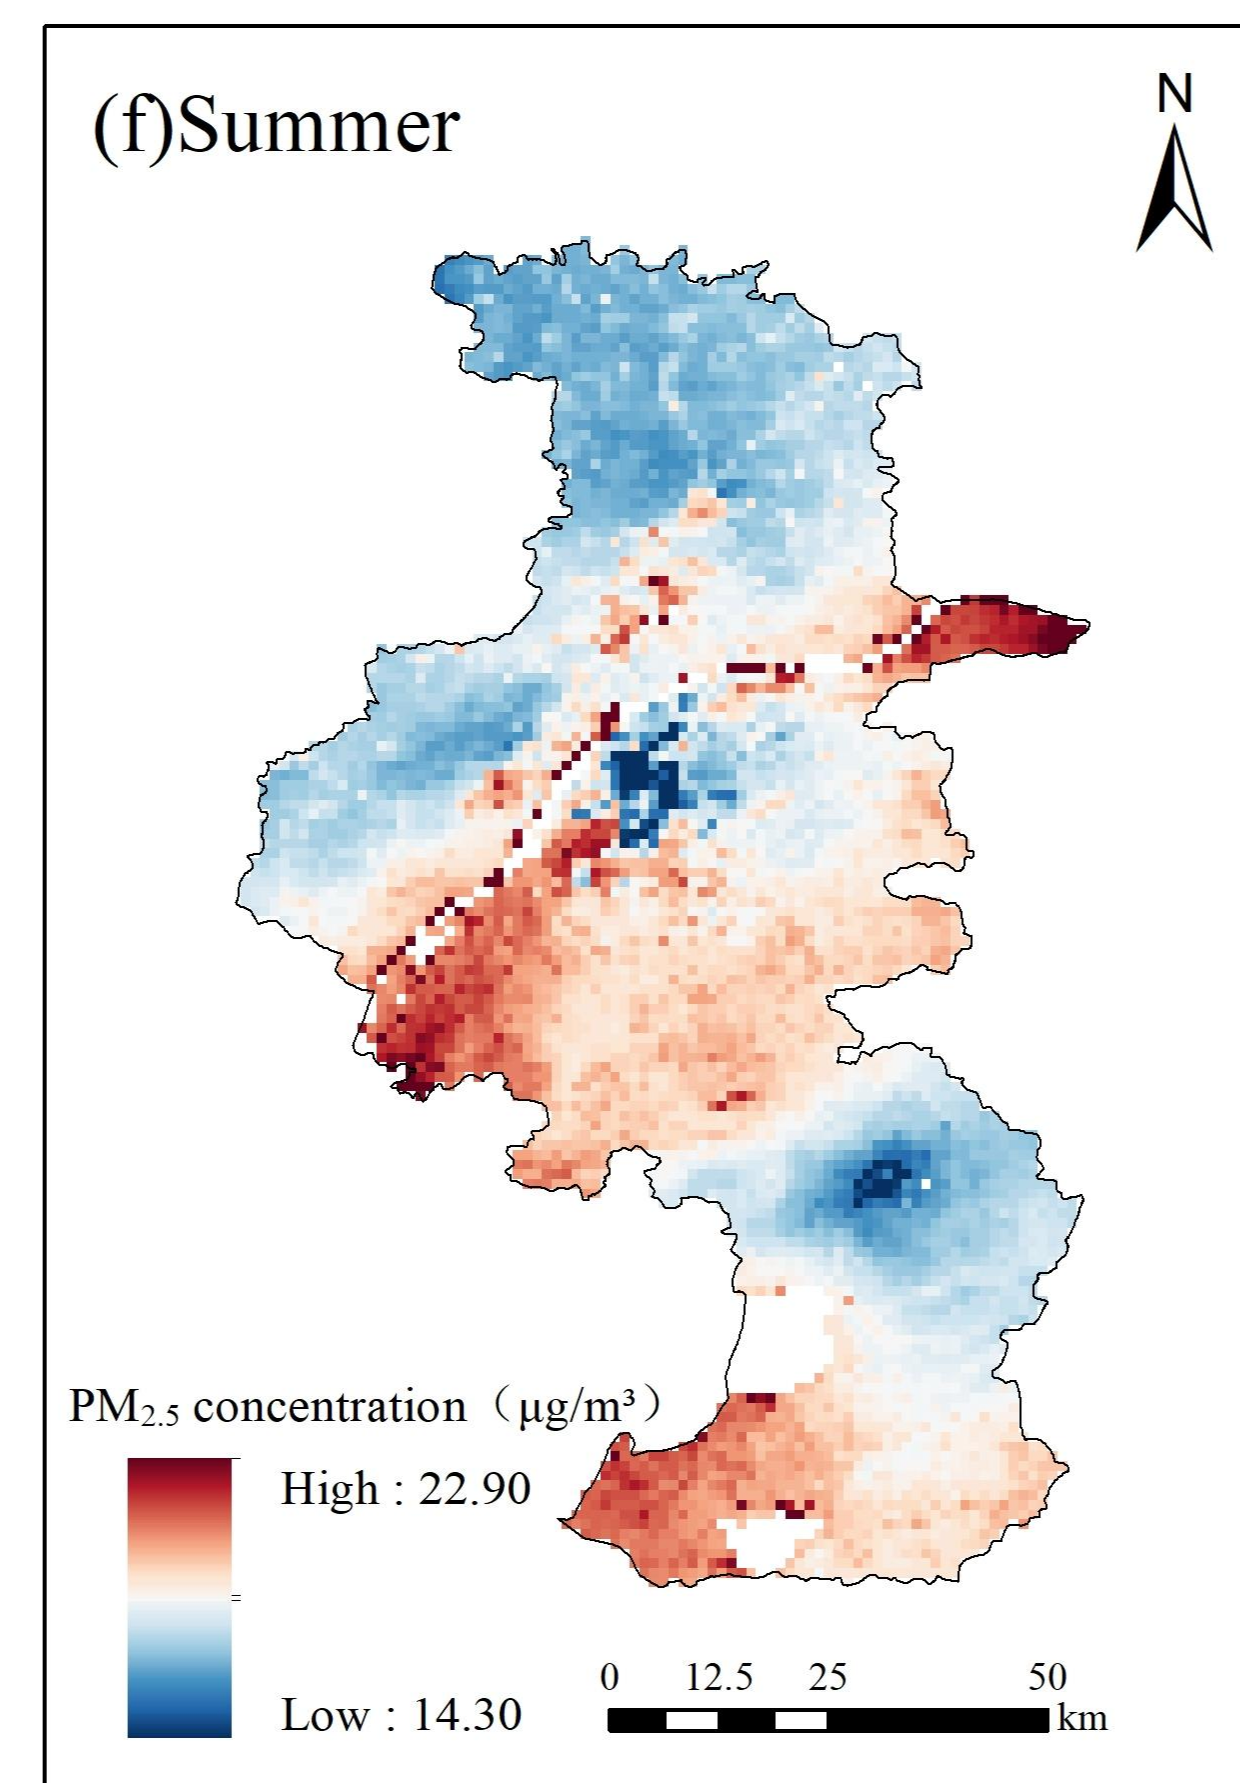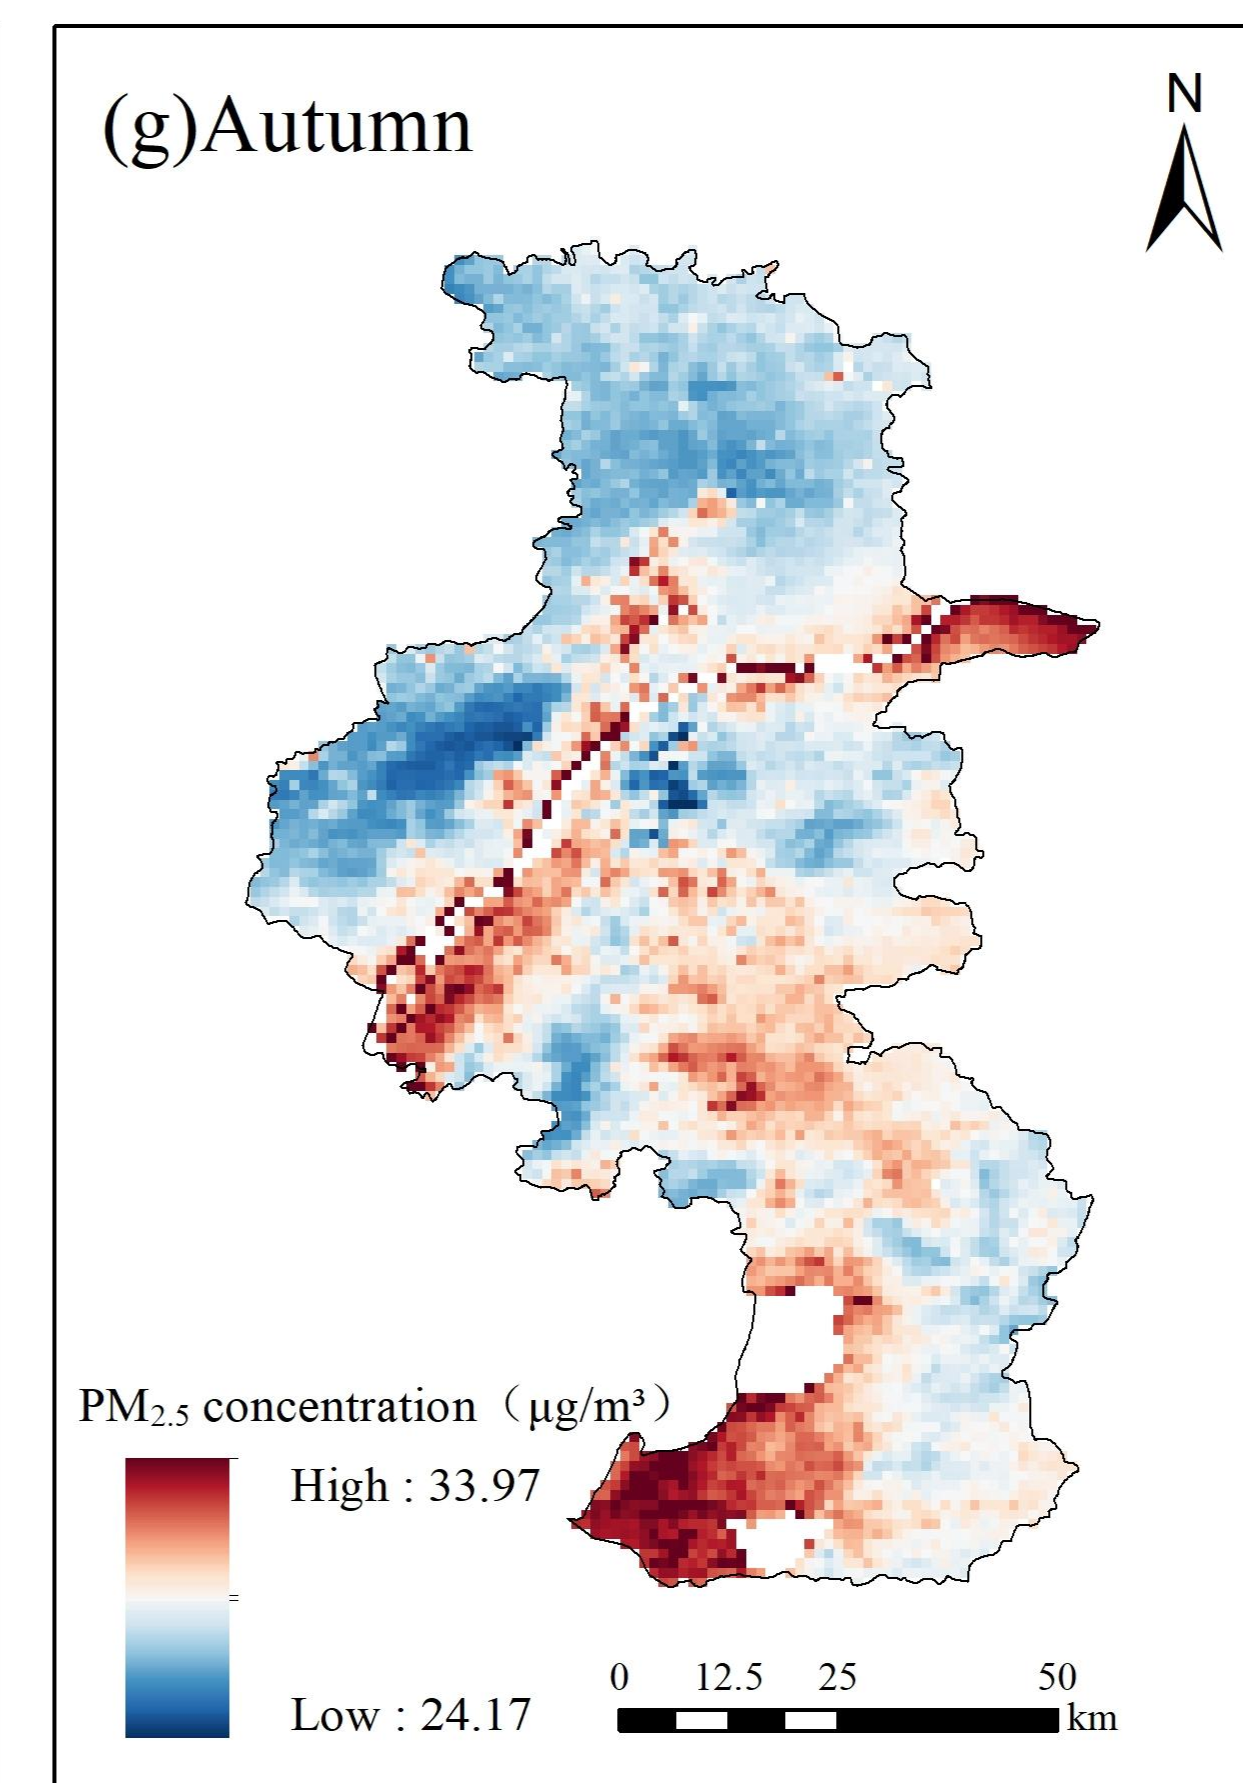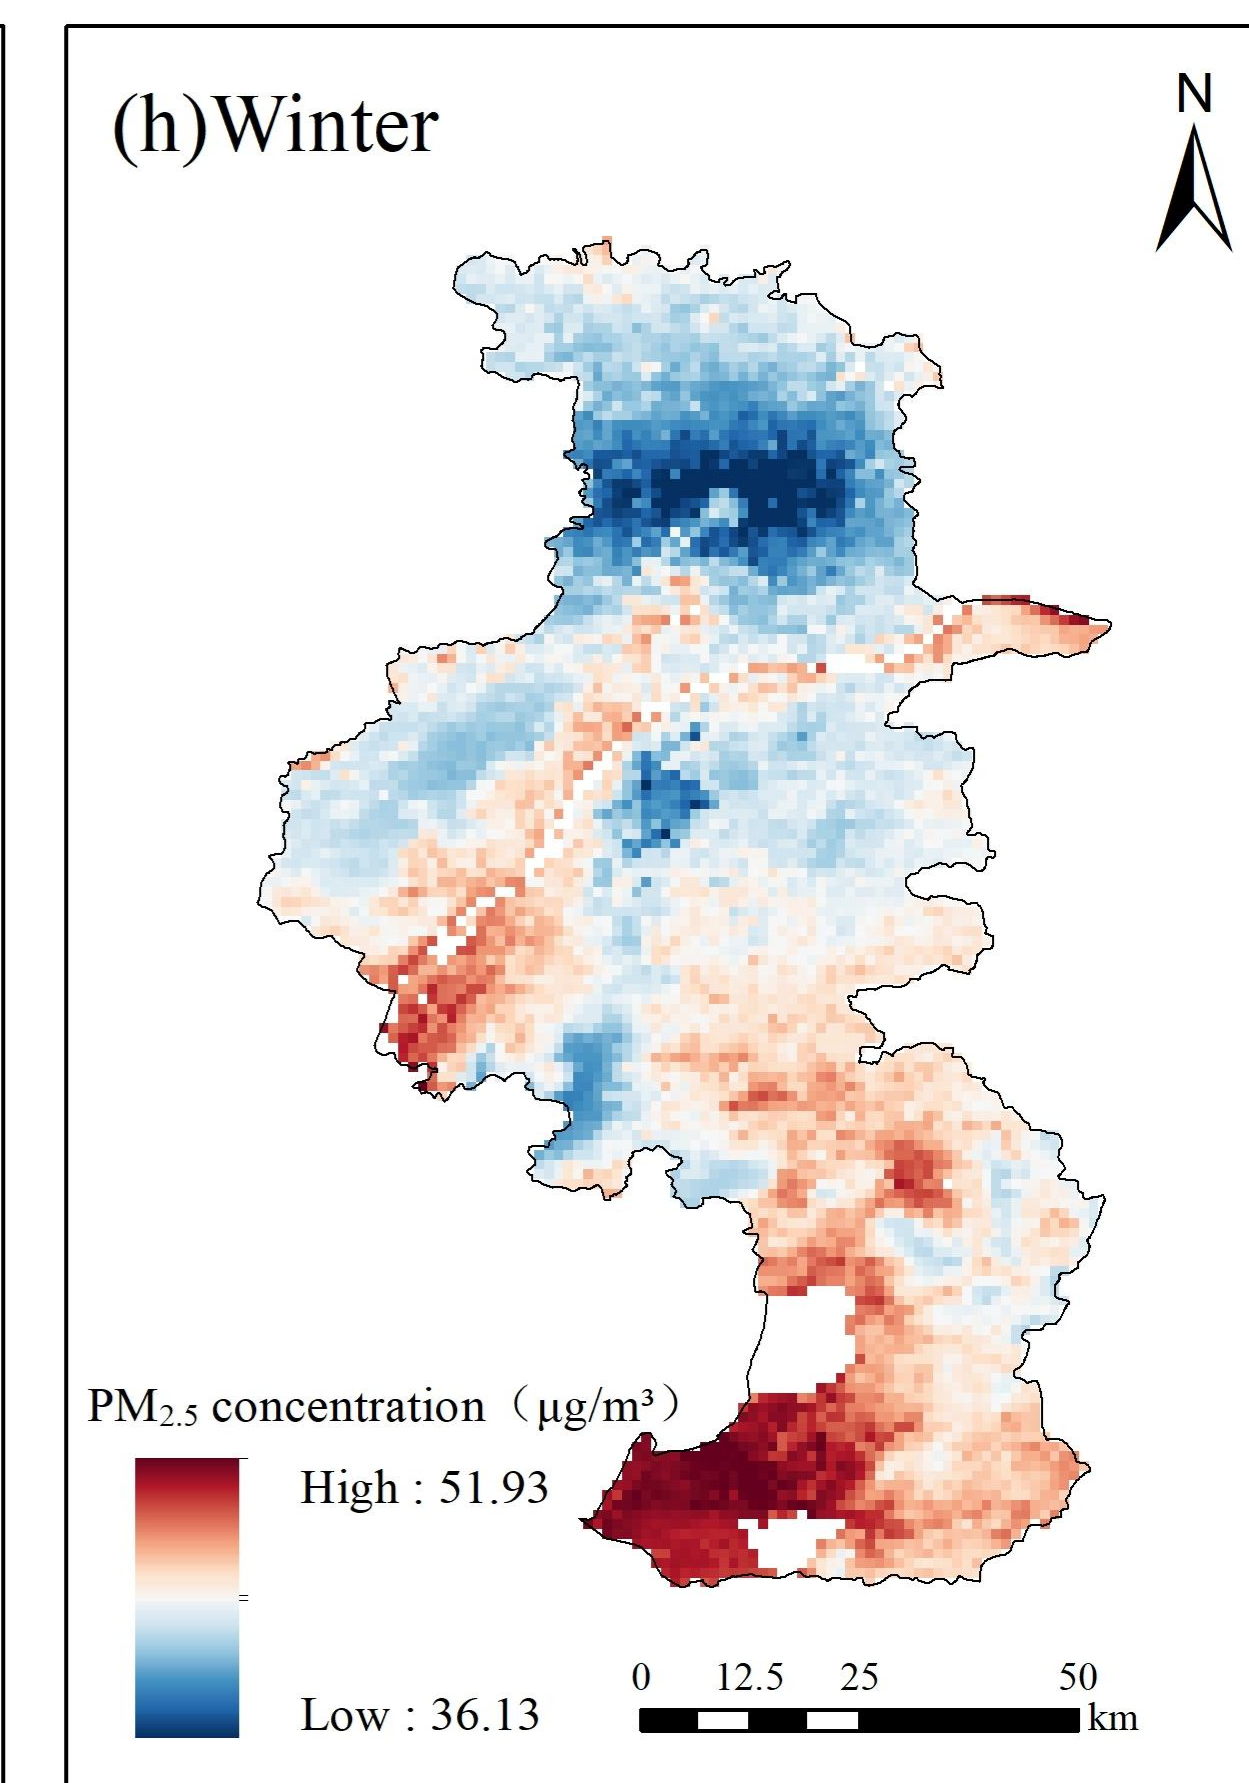

Supplement: d6ea00049e4.pdf [file d6ea00049e4.pdf]

Smoothing effect on  $PM_{2.5}$  concentrations

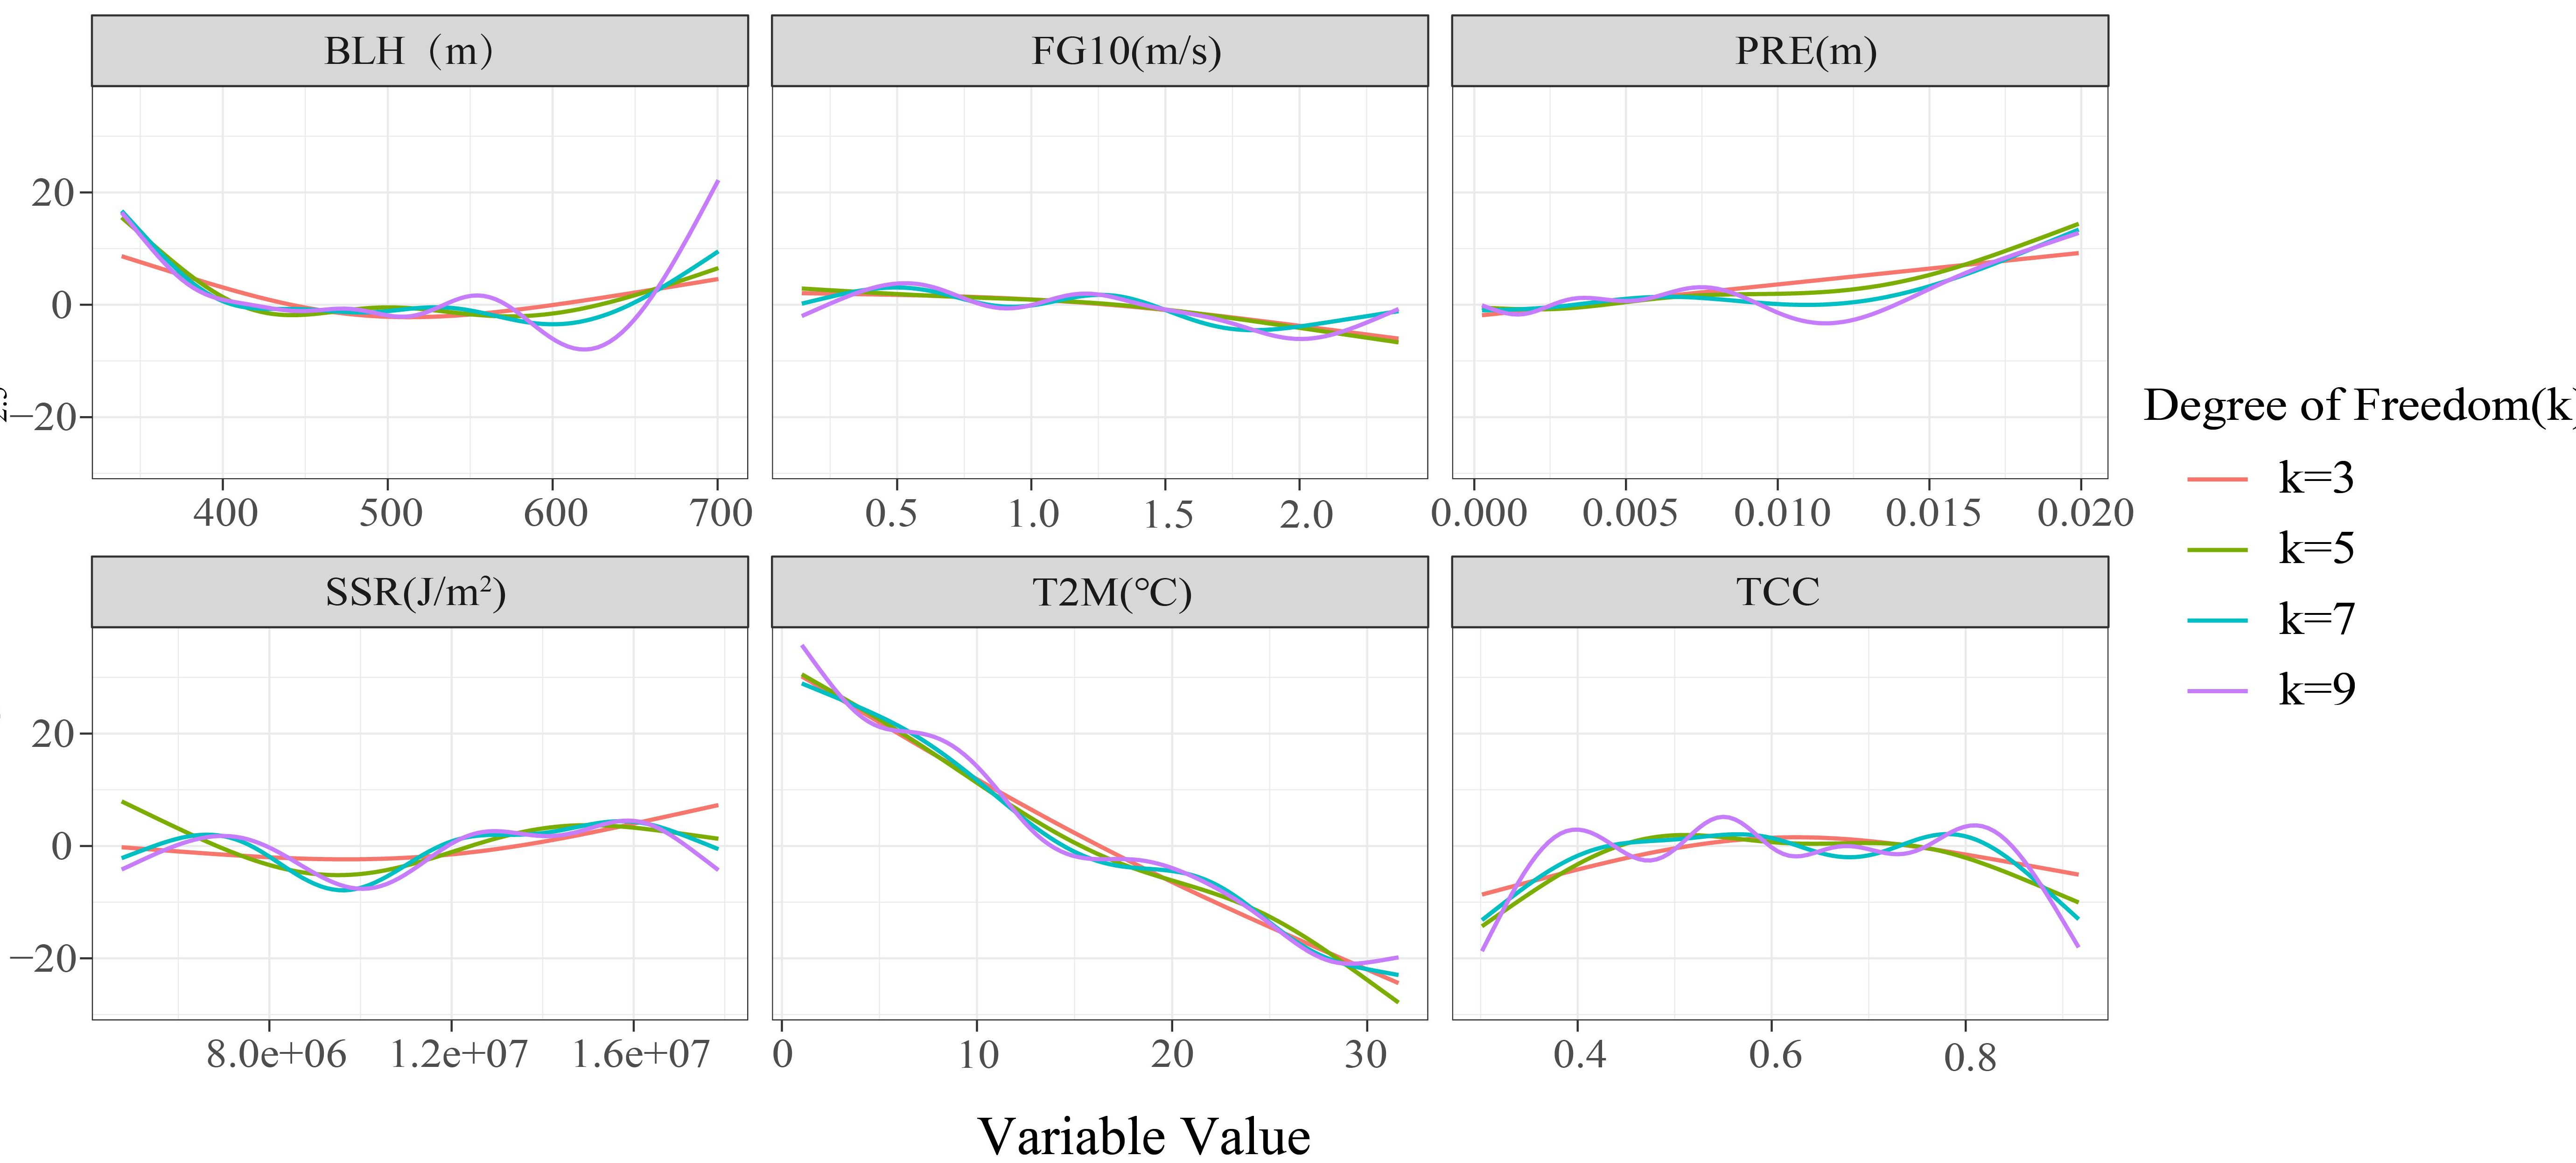

Supplement: d6ea00049e5.pdf [file d6ea00049e5.pdf]

# Series residuals(model)

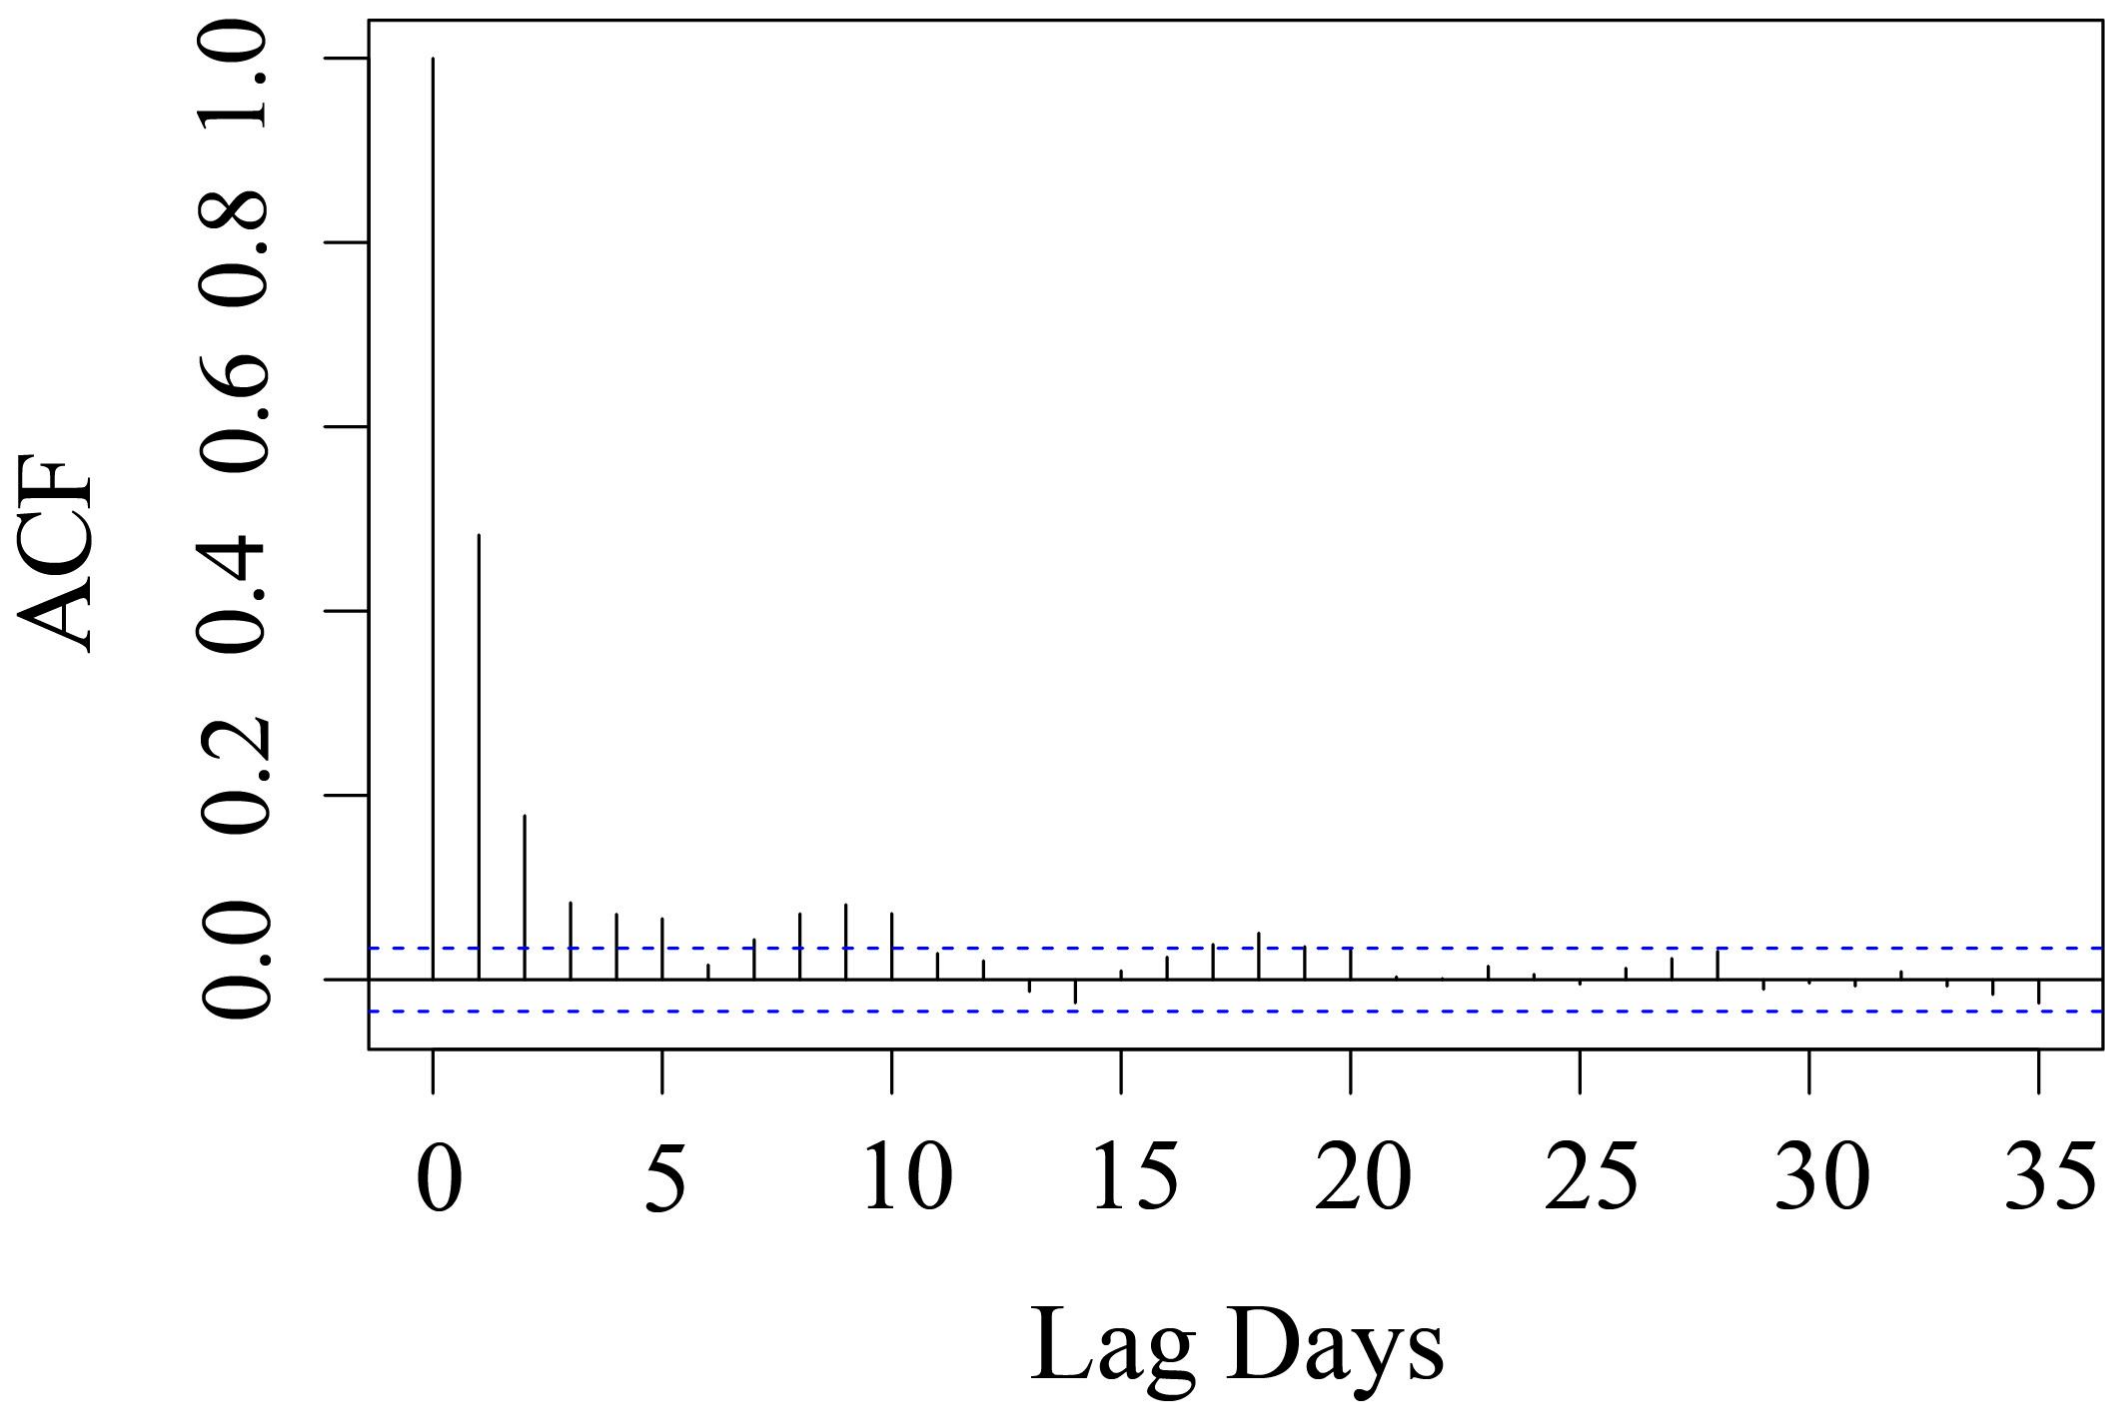

Supplement: d6ea00049e6.pdf [file d6ea00049e6.pdf]
